# Supplementary material
Source: Springer Nature journal article supplement (https://www.springermedizin.de/resource/supplementary/13014_2008_117_MOESM1_ESM.pdf/9632944)

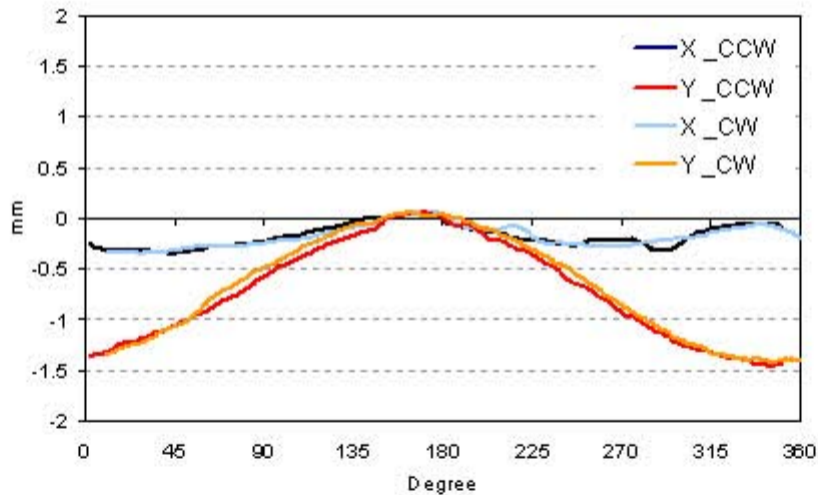

Supplement: MOESM1 [file 9632944]
